# Supplementary material for: Thieno[3,4-b]pyrazine-based oligothiophenes: simple models of donor–acceptor polymeric materials
Source: Royal Society of Chemistry journal article supplement (doi:10.1039/c4cp00312h), 2014-01-01
Supplement: c4cp00312h1.pdf [file c4cp00312h1.pdf]

## SUPPORTING INFORMATION

### Thieno[3,4-*b*]pyrazine-based Oligothiophenes: Simple Models of Donor-Acceptor Polymeric Materials

Li Wen, Christopher L. Heth, and Seth C. Rasmussen\*

*Department of Chemistry and Biochemistry, North Dakota State University, NDSU Dept. 2735, P.O. Box 6050, Fargo, ND 58108-6050, United States. Fax: 1-701-231-8747; Tel: 1-701-231-8831; E-mail: seth.rasmussen@ndsu.edu*

#### Table of Contents:

|                                                                                                                                                   |    |
|---------------------------------------------------------------------------------------------------------------------------------------------------|----|
| I. <b>Figure S1.</b> <sup>1</sup> H NMR Spectrum of Compound <b>3a</b> .....                                                                      | S2 |
| II. <b>Figure S2.</b> <sup>1</sup> H NMR Spectrum of Compound <b>10a</b> .....                                                                    | S2 |
| III. <b>Figure S3.</b> <sup>13</sup> C NMR Spectrum of Compound <b>10a</b> .....                                                                  | S2 |
| IV. <b>Figure S4.</b> <sup>1</sup> H NMR Spectrum of 2,3-dimethyl-5-(trimethylsilyl)-7-(trimethylstannyl)thieno-<br>[3,4- <i>b</i> ]pyrazine..... | S3 |
| V. <b>Figure S5.</b> <sup>1</sup> H NMR Spectrum of Compound <b>3b</b> .....                                                                      | S3 |
| VI. <b>Figure S6.</b> <sup>13</sup> C NMR Spectrum of Compound <b>3b</b> .....                                                                    | S3 |
| VII. <b>Figure S7.</b> <sup>1</sup> H NMR Spectrum of Compound <b>3c</b> .....                                                                    | S4 |
| VIII. <b>Figure S8.</b> <sup>1</sup> H NMR Spectrum of Compound <b>4b</b> .....                                                                   | S4 |
| IX. <b>Figure S9.</b> <sup>13</sup> C NMR Spectrum of Compound <b>4b</b> .....                                                                    | S4 |
| X. <b>Figure S10.</b> <sup>1</sup> H NMR Spectrum of Compound <b>4c</b> .....                                                                     | S5 |
| XI. <b>Figure S11.</b> <sup>1</sup> H NMR Spectrum of Compound <b>6</b> .....                                                                     | S5 |
| XII. <b>Figure S12.</b> <sup>13</sup> C NMR Spectrum of Compound <b>6</b> .....                                                                   | S5 |
| XIII. <b>Figure S13.</b> <sup>1</sup> H NMR Spectrum of Compound <b>8</b> .....                                                                   | S6 |
| XIV. <b>Figure S14.</b> <sup>13</sup> C NMR Spectrum of Compound <b>8</b> .....                                                                   | S6 |
| XV. <b>Figure S15.</b> Extrapolation of absorption data for the oligomeric series <b>3a-c</b> .....                                               | S6 |
| XVI. <b>Figure S16.</b> UV-vis spectra of mixed TP-thiophene terthienyls <b>5</b> and <b>6</b> .....                                              | S7 |
| XVII. <b>Figure S17.</b> UV-vis spectra of mixed TP-EDOT terthienyls <b>7</b> and <b>8</b> .....                                                  | S7 |
| XVIII. <b>Figure S18.</b> Cyclic voltammograms of mixed terthienyls <b>5-8</b> .....                                                              | S8 |
| XIX. <b>Figure S19.</b> Electronic density contours for mixed TP-thiophene oligomers <b>5</b> and <b>6</b> .....                                  | S9 |
| XX. <b>Figure S20.</b> Electronic density contours for mixed TP-EDOT oligomers <b>7</b> and <b>8</b> .....                                        | S9 |

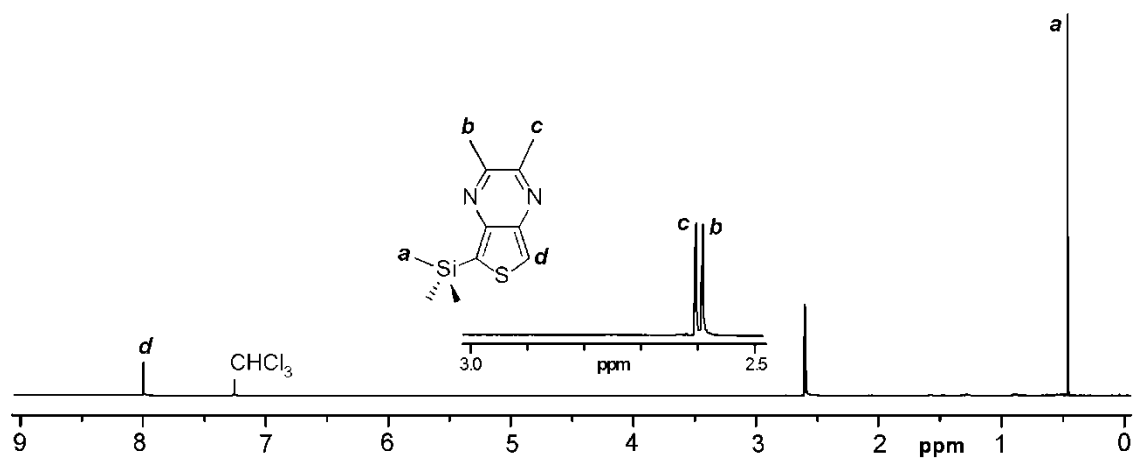

Figure S1.  $^1\text{H}$  NMR Spectrum of Compound **3a**

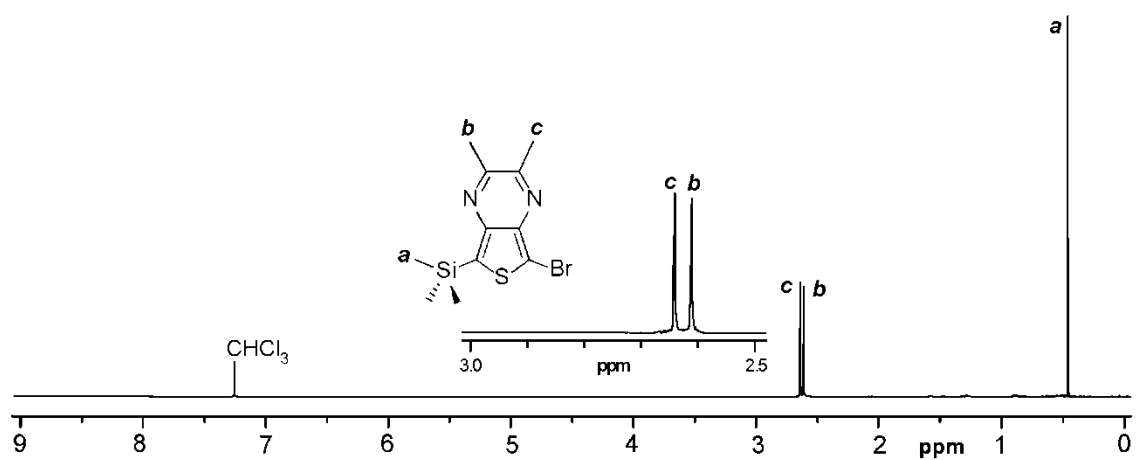

Figure S2.  $^1\text{H}$  NMR Spectrum of Compound **10a**

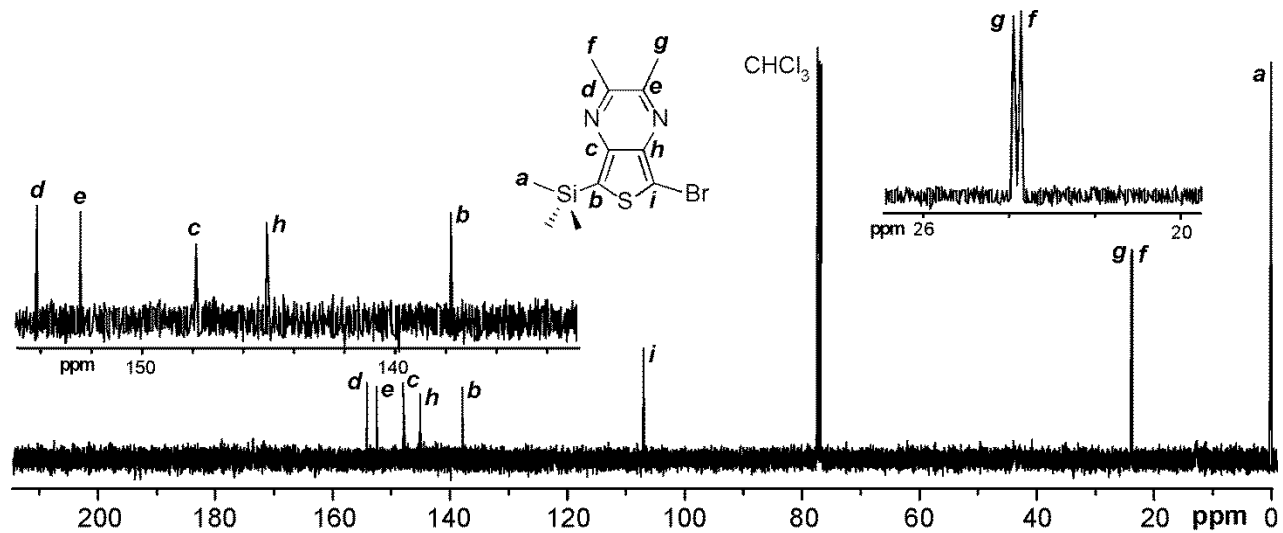

Figure S3.  $^{13}\text{C}$  NMR Spectrum of Compound **10a**

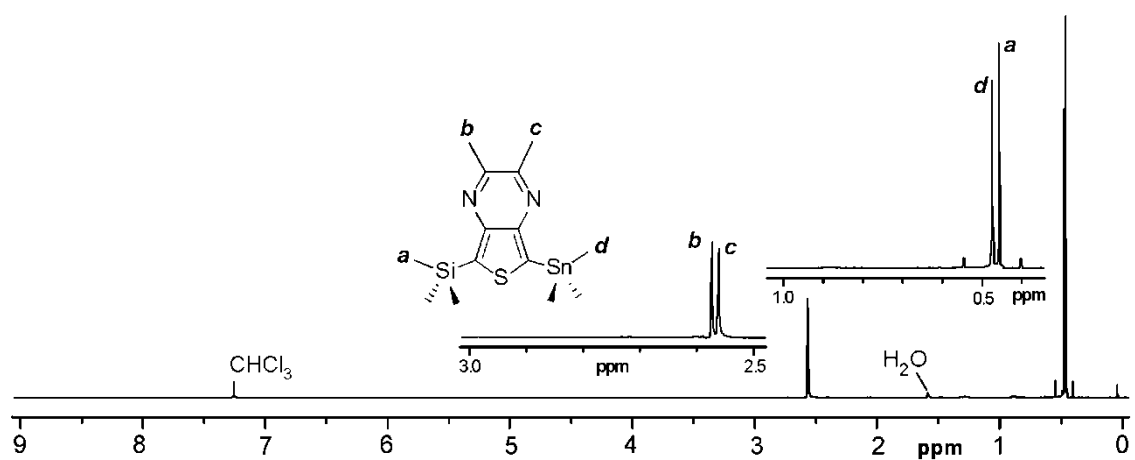

**Figure S4.**  $^1\text{H}$  NMR Spectrum of 2,3-dimethyl-5-(trimethylsilyl)-7-(trimethylstannyl)thieno[3,4-*b*]pyrazine

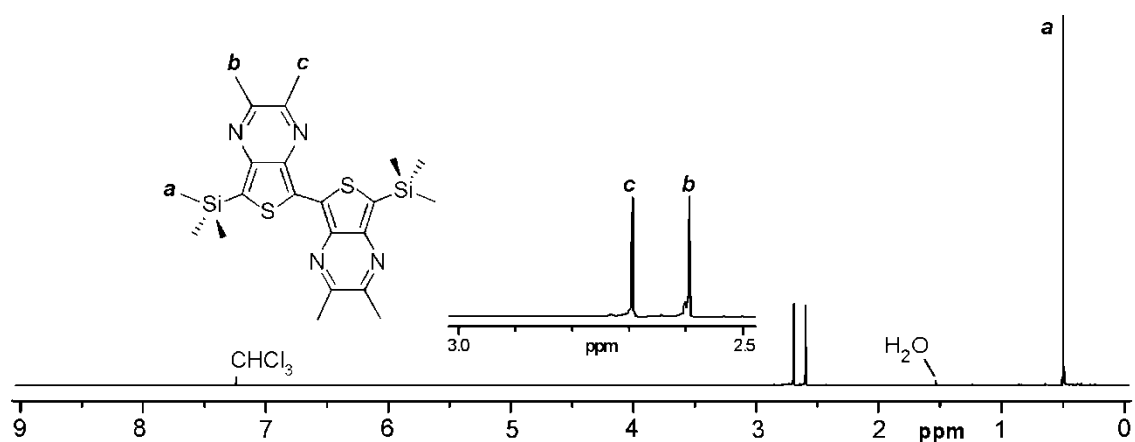

**Figure S5.**  $^1\text{H}$  NMR Spectrum of Compound **3b**

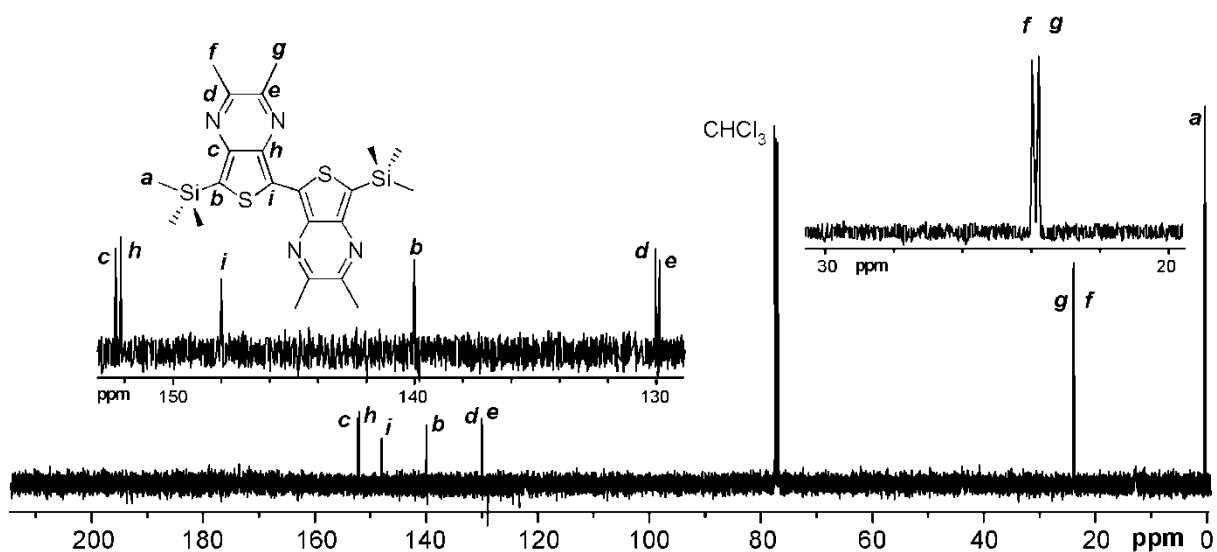

**Figure S6.**  $^{13}\text{C}$  NMR Spectrum of Compound **3b**

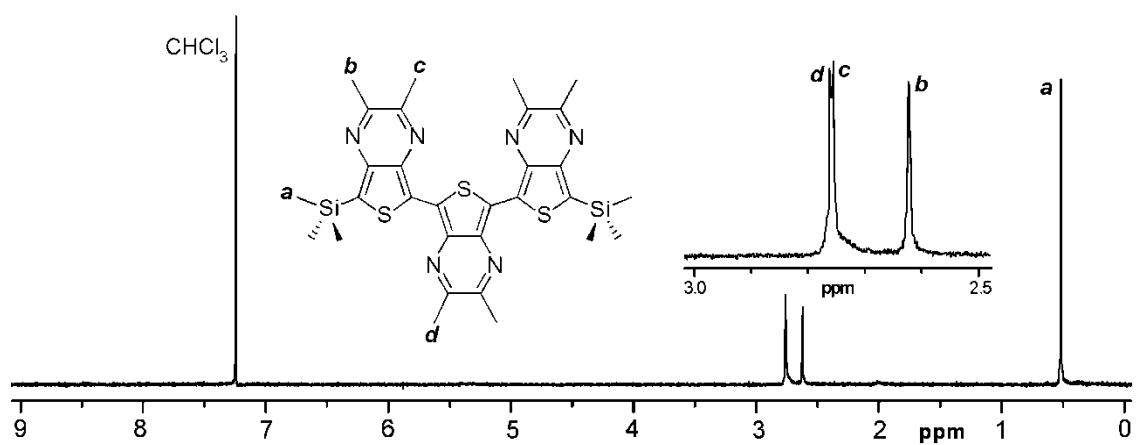

Figure S7.  $^1\text{H}$  NMR Spectrum of Compound 3c

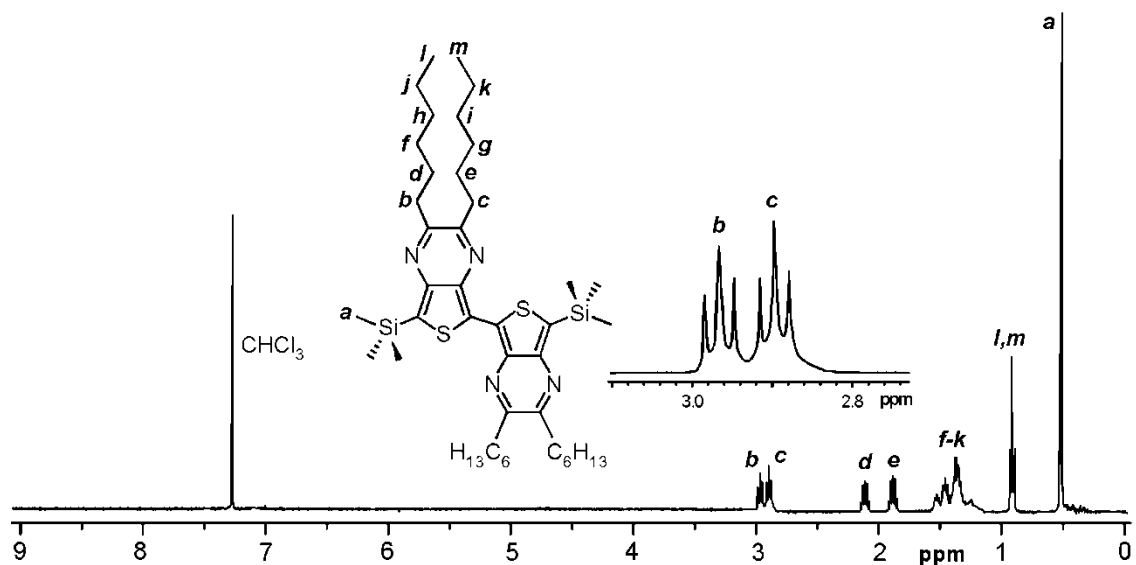

Figure S8.  $^1\text{H}$  NMR Spectrum of Compound 4b

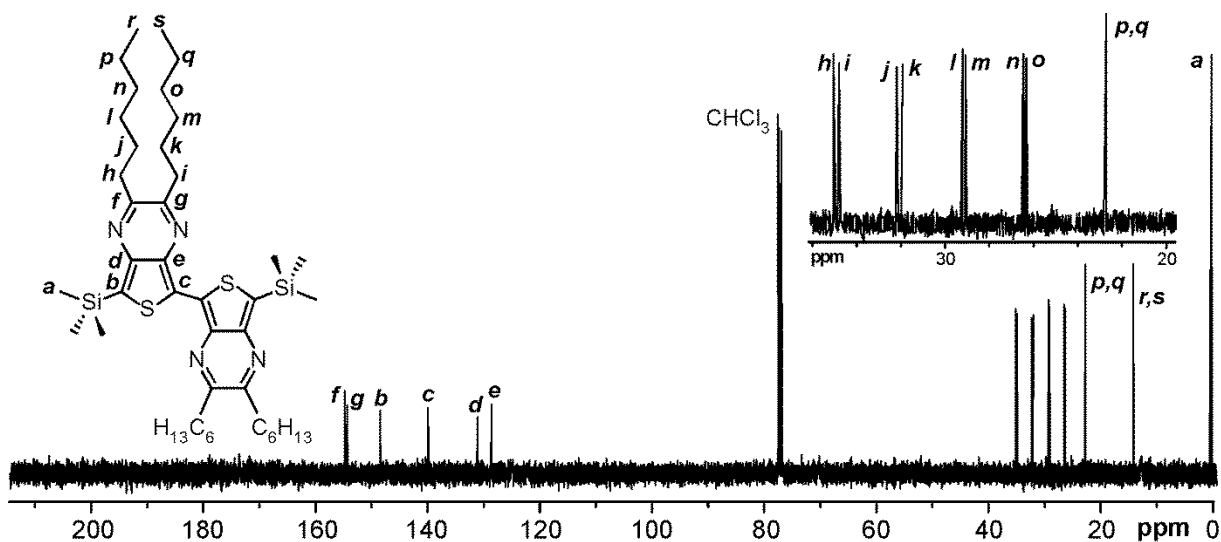

Figure S9.  $^{13}\text{C}$  NMR Spectrum of Compound 4b

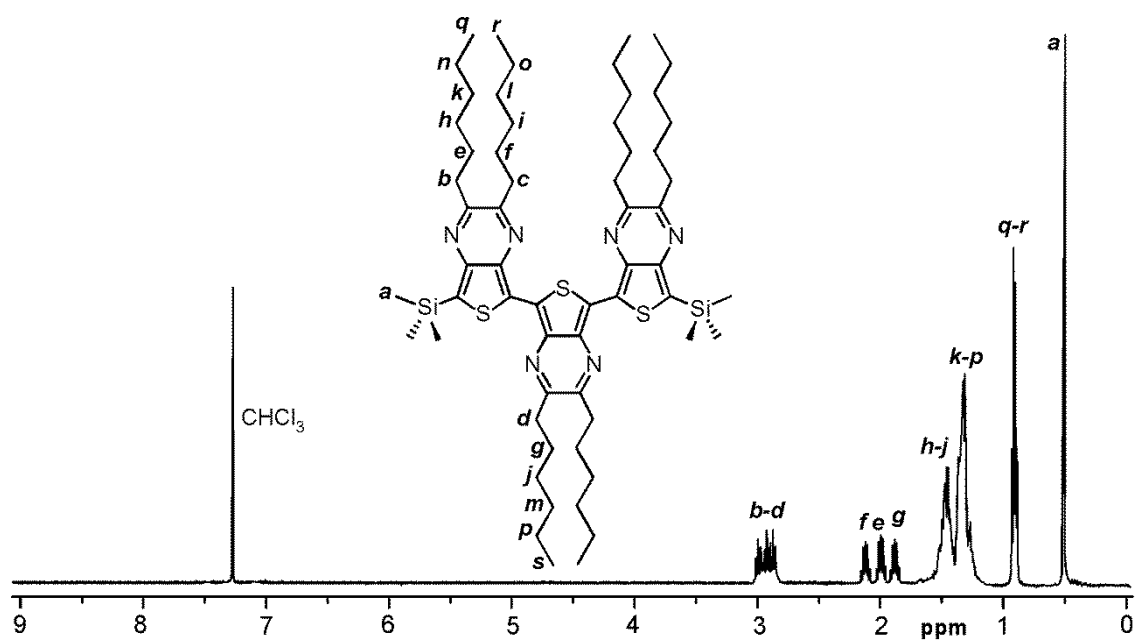

Figure S10.  $^1\text{H}$  NMR Spectrum of Compound 4c

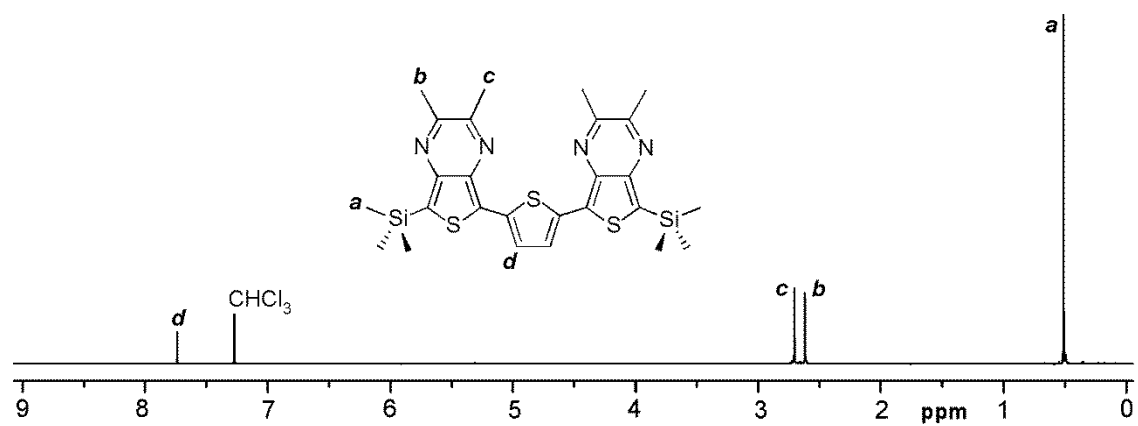

Figure S11.  $^1\text{H}$  NMR Spectrum of Compound 6.

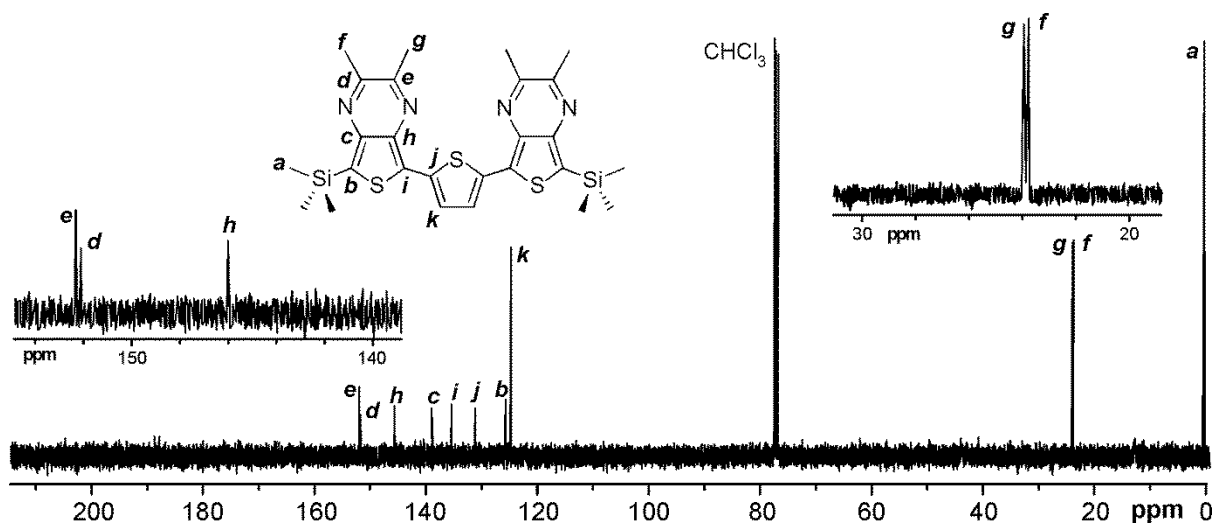

Figure S12.  $^{13}\text{C}$  NMR Spectrum of Compound 6

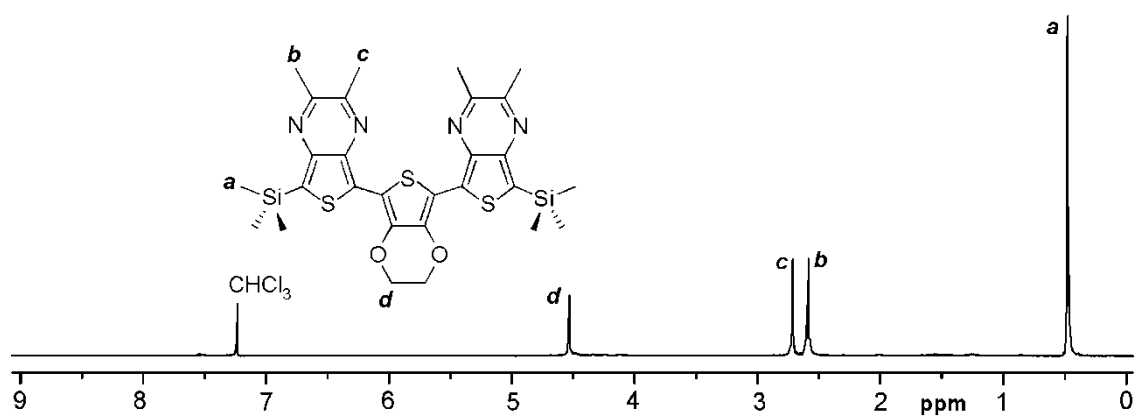

Figure S13. <sup>1</sup>H NMR Spectrum of Compound 8

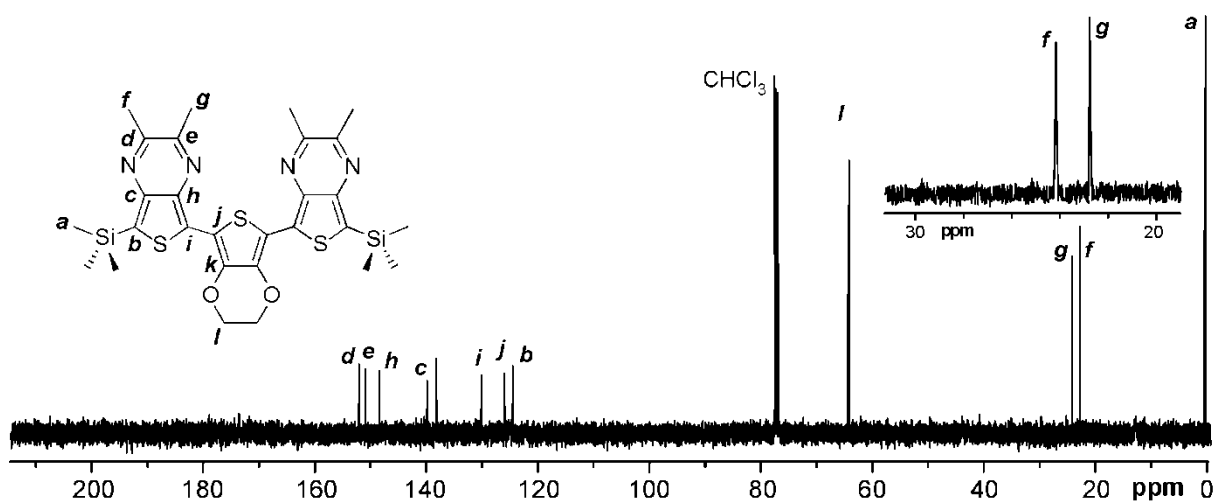

Figure S14. <sup>13</sup>C NMR Spectrum of Compound 8

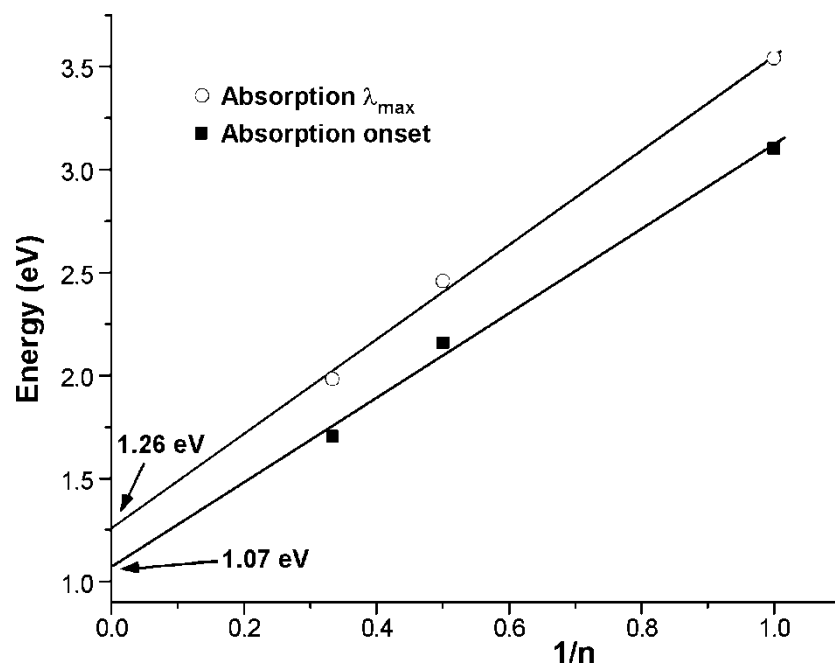

Figure S15. Extrapolation of absorption data for the oligomeric series 3a-c

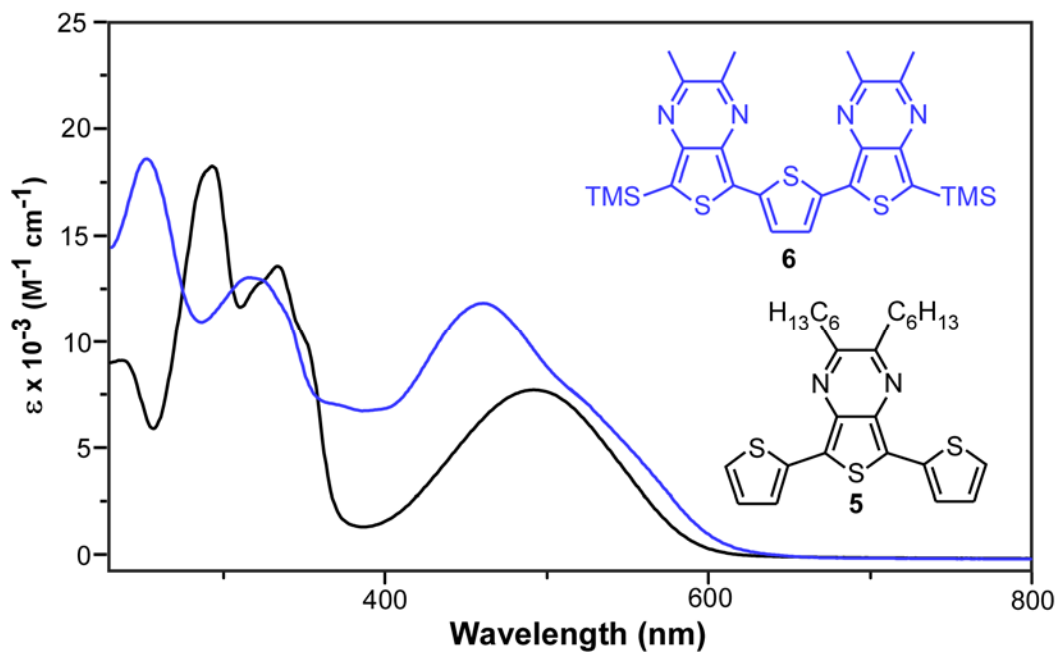

**Figure S16.** UV-vis spectra of mixed TP-thiophene terthienyls **5** and **6**

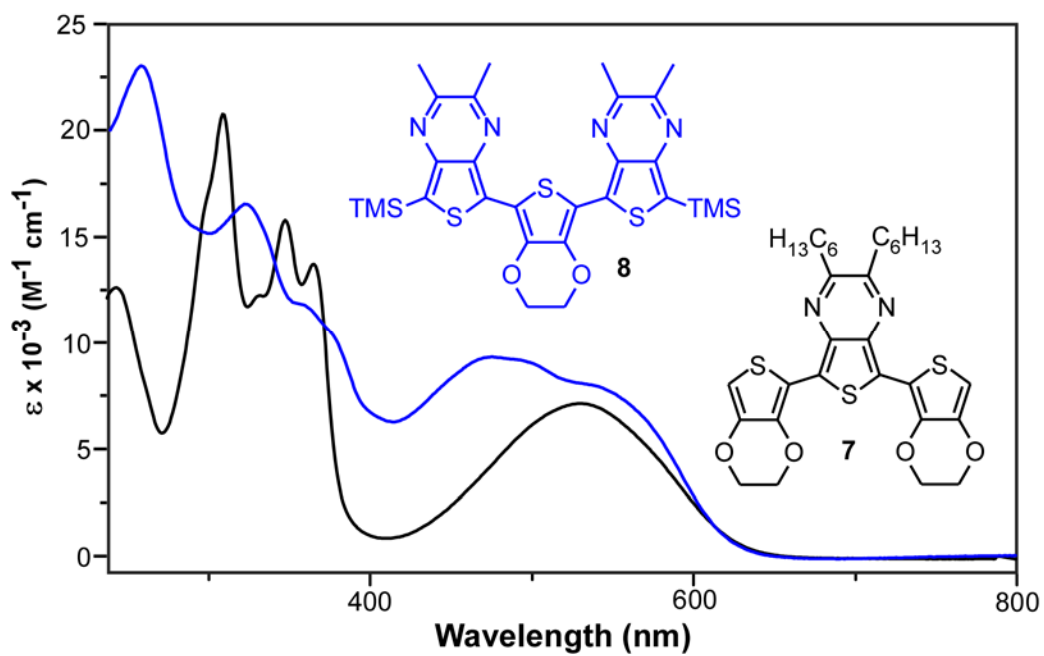

**Figure S17.** UV-vis spectra of mixed TP-EDOT terthienyls **7** and **8**

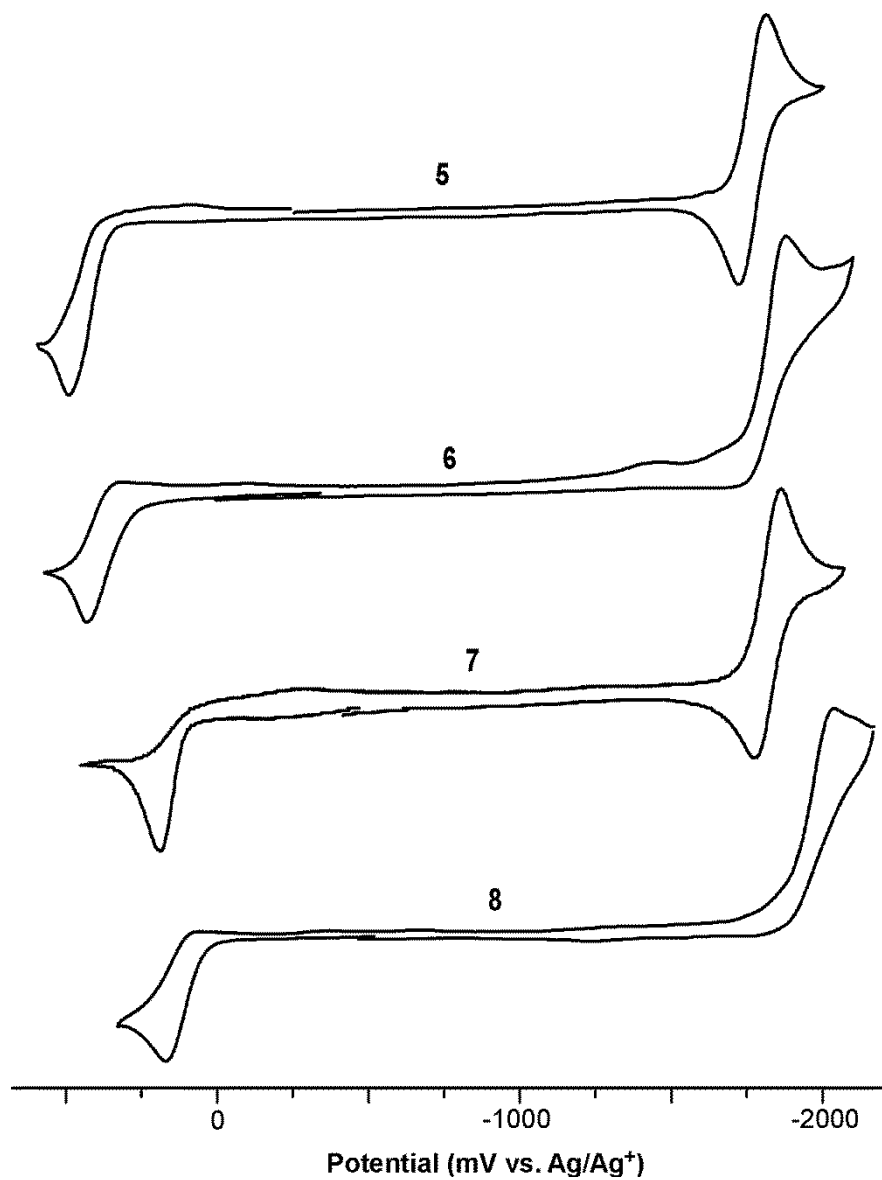

**Figure S18.** Cyclic voltammograms of mixed terthienyls 5-8



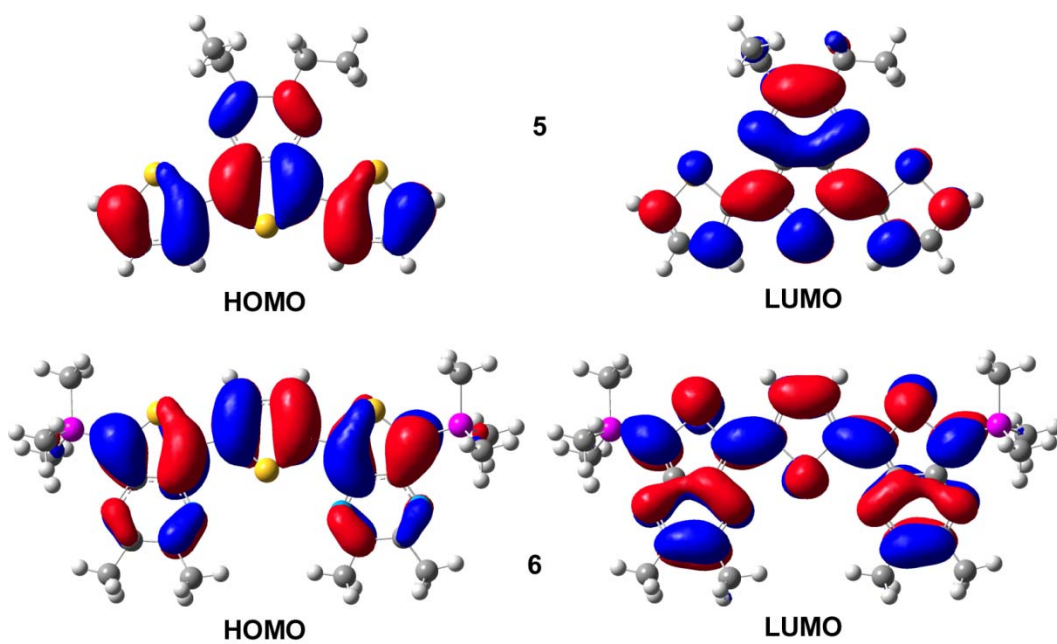

**Figure S19.** Electronic density contours for mixed TP-thiophene oligomers 5 and 6.

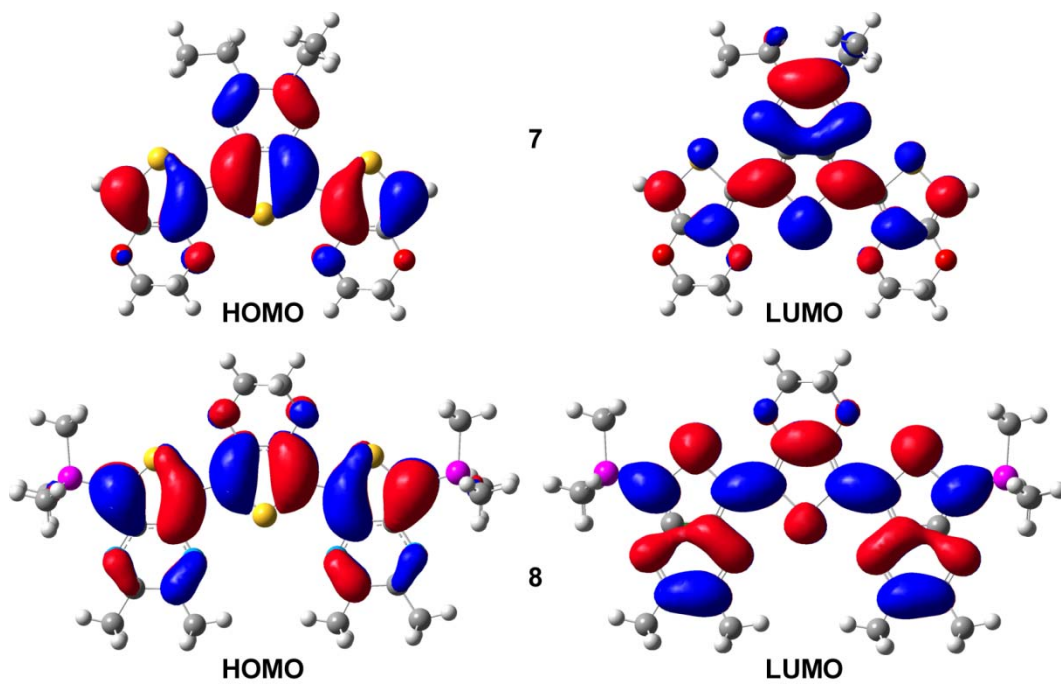

**Figure S20.** Electronic density contours for mixed TP-EDOT oligomers 7 and 8.
